# Supplementary material
Source: publisher site journal article supplement (https://www.dovepress.com/get_supplementary_file.php?f=388117.docx)
Supplement: Supplementary file 1 [file get_supplementary_file.php]

Supplement table 1. Correlation between the baseline amino acid levels and change in aminotransferase

| Amino acids | β (95% CI) | p |
| --- | --- | --- |
| AAA | -0.153(-0.302,-0.004) | 0.045 |
| BCAA | -0.065(-0.123,-0.006) | 0.031 |
| Ile | -0.345(-0.706,0.017) | 0.061 |
| Leu | -0.197(-0.372,-0.023) | 0.028 |
| Phe | -0.356(-0.687,-0.025) | 0.035 |
| Trp | -0.32(-0.845,0.206) | 0.228 |
| Tyr | -0.336(-0.711,0.039) | 0.078 |
| Val | -0.113(-0.222,-0.005) | 0.041 |

Abbreviations: Leu, leucine; Ile, isoleucine; Val, valine; Phe, phenylalanine; Trp, tryptophan; Tyr, tyrosine; AAA, aromatic amino acids; BCAA,branched chain amino acids; CI, confidence interval.
